# Supplementary material
Source: MDPI journal article supplement (https://www.mdpi.com/1999-4907/12/11/1529)
Supplement: s1 [file s1]

## Supplementary Material

# Soil carbon modelling in *Salix* biomass plantations: variety determines carbon sequestration and climate impacts

Saurav Kalita <sup>1</sup>, Hanna Karlsson Potter <sup>1</sup>, Martin Weih <sup>2</sup>, Christel Baum <sup>3,\*</sup>, Åke Nordberg <sup>1</sup> and Per-Anders Hansson <sup>1</sup>

<sup>1</sup> Department of Energy and Technology, Swedish University of Agricultural Sciences, 750 07 Uppsala, Sweden; saurav.kalita@slu.se (S.K.); hanna.e.karlsson@slu.se (H.K.P.); ake.nordberg@slu.se (Å.N.); per-anders.hansson@slu.se (P-A.H.)

<sup>2</sup> Department of Crop Production Ecology, Swedish University of Agricultural Sciences, 750 07 Uppsala, Sweden; martin.weih@slu.se

<sup>3</sup> Soil Science, Faculty of Agricultural and Environmental Sciences, University of Rostock, 18051 Rostock, Germany; christel.baum@uni-rostock.de

\* Correspondence: christel.baum@uni-rostock.de; Tel.: +49-381 498 3100; Fax: +49-381 498 3122

**Table S1** Parameters used to model SOC changes in ICBM [46,58,60]

|                           | $k_Y$ | $k_O$  | $r_e$ | $h_a$ | $h_b$ | $i_a$ | $i_b$             |
|---------------------------|-------|--------|-------|-------|-------|-------|-------------------|
| Green fallow              | 0.8   | 0.0085 | 1     | 0.17  | 0.39  | 0.72  | 0.86 <sup>1</sup> |
| <i>Salix</i> <sup>2</sup> | 0.8   | 0.0085 | 1     | 0.17  | 0.39  | -     | -                 |

<sup>1</sup>belowground biomass input adjusted for 20cm soil depth

<sup>2</sup>Above and belowground input for *Salix* varieties calculated based on yield levels and biomass allocation

**Table S2** Initial values of aboveground ( $Y_a$ ) and belowground ( $Y_b$ ) young pool, and old pool (O) used in the ICBM calculation. The initial SOC stock was divided between the different pools ( $Y_a$ ,  $Y_b$  and O) by using the ratio of each individual pool to the total SOC pool at steady state.

|              | $Y_a$ | $Y_b$ | O     |
|--------------|-------|-------|-------|
| Green fallow | 0.31  | 0.62  | 27.92 |
| <i>Salix</i> | 0.31  | 0.62  | 27.92 |

**Table S3** Values used to calculate the biomass allocation between the different pools (stems, leaves, fine roots and coarse roots) at stages of growth as a percentage of their 3-year net primary production [61].

| Year | Annual biomass allocation (% of 3-year total accumulation) |            |                |                               |
|------|------------------------------------------------------------|------------|----------------|-------------------------------|
|      | Stems (S)                                                  | Leaves (L) | Fine Roots (F) | Coarse Roots (C) <sup>1</sup> |
| n.1  | 11%                                                        | 13%        | 19%            | 24%                           |
| n.2  | 47%                                                        | 39%        | 38%            | 49%                           |
| n.2  | 41%                                                        | 48%        | 42%            | 26%                           |

<sup>1</sup> Coarse roots include the stumps and cuttings

**Table S4** The nitrogen (N) content in leaf litter was calculated according to the abscission leaf N content by variety and fertilization as reported by Weih and Nordh, 2002[41] . (Suffixes F0 and F+ denotes unfertilized and fertilized treatments)

| Salix variety and treatment | Abscission leaf N concentration |
|-----------------------------|---------------------------------|
| Björn F0                    | 1.04%                           |
| Björn F+                    | 1.15%                           |
| Gudrun F0                   | 0.66%                           |
| Gudrun F+                   | 0.65%                           |
| Jorr F0                     | 1.38%                           |
| Jorr F+                     | 1.22%                           |
| Loden F0                    | 0.94%                           |
| Loden F+                    | 0.89%                           |
| Tora F0                     | 0.90%                           |
| Tora F+                     | 0.88%                           |
| Tordis F0                   | 0.84%                           |
| Tordis F+                   | 0.93%                           |

**Table S5** The nitrogen (N) content of roots was calculated from the dataset by Manzoni et al., 2021[57]. As data for individual varieties included in our study are unavailable, mean root N-content of *Salix* cultivated in low nutrient (F0) and high nutrient (F+) conditions were calculated. *Salix* grown under low frequency watering were excluded from the calculation.

|          | Mean N-content of roots |          |           |
|----------|-------------------------|----------|-----------|
|          | mg N/g dry wt.          | Std dev. | % dry wt. |
|          | 13.02                   | 5.0      | 1.30%     |
| Salix_F0 | 8.35                    | 1.3      | 0.83%     |
| Salix_F+ | 17.6                    | 2.1      | 1.76%     |

**Table S6** Energy input and emissions associated with production of pesticides, cutting, fertilizer and fossil fuels

| Input                              | Amount    | Energy<br>[MJ/ha] | CO <sub>2</sub><br>[g/ha] | CH <sub>4</sub><br>[g/ha] | N <sub>2</sub> O<br>[g/ha] | Reference                                          |
|------------------------------------|-----------|-------------------|---------------------------|---------------------------|----------------------------|----------------------------------------------------|
| Pesticide                          |           |                   |                           |                           |                            |                                                    |
| - Roundup                          | 5 l/ha    | 481.38            | 11958                     | 0.4374                    | 3.6693                     | (Ahlgren, 2004;<br>Nilsson and<br>Bernesson, 2008) |
| - Cougar                           | 1 l/ha    | 118.86            | 2952.6                    | 0.108                     | 0.906                      |                                                    |
| Cuttings                           | 18000 /ha | 1120.98           | 1014369                   | 158.40                    |                            | Adapted from<br>Nilsson and<br>Bernesson, 2008     |
| Fertilizer                         |           | Energy<br>[MJ/kg] | CO <sub>2</sub><br>[g/kg] | CH <sub>4</sub><br>[g/kg] | N <sub>2</sub> O<br>[g/kg] | Adapted from GaBi<br>Database                      |
| - N<br>(Ammonium<br>Nitrate based) | 100 kg/ha | 35.2              | 2839                      | 8                         | 2                          | ("GaBi Process data<br>set: AN," 2018)             |
| - P                                | 14 kg/ha  | 7.79              | 489                       | 1                         | 0                          | ("GaBi Process data<br>set: TSP," 2018)            |
| - K                                | 47 kg/ha  | 5.54              | 342                       | 0                         | 0                          | ("GaBi Process data<br>set: KCl," 2018)            |
| Fuel production                    |           |                   | CO <sub>2</sub>           | CH <sub>4</sub>           | N <sub>2</sub> O           |                                                    |
| Diesel                             |           |                   | [g/MJ]                    | [g/MJ]                    | [g/MJ]                     |                                                    |
|                                    |           |                   | 5.78                      | 0.0338                    | 0.0000555                  | (Öman et al., 2011)                                |
| Natural Gas                        |           |                   | 5.53                      | 0.275                     | 2.6E-12                    | (Gode et al., 2011)                                |

**Table S7** Data used to estimate emissions and energy usage for operations in the biomass procurement chain

| Operation              | Diesel<br>[MJ/ha]                                            | Energy<br>[MJ/ha] | CO <sub>2</sub><br>[g/ha] | CH <sub>4</sub><br>[g/ha] | N <sub>2</sub> O<br>[g/ha] | Reference                                            |
|------------------------|--------------------------------------------------------------|-------------------|---------------------------|---------------------------|----------------------------|------------------------------------------------------|
| Field Preparation      |                                                              |                   |                           |                           |                            |                                                      |
| - Plowing              | 1870                                                         | 1870              | 154000                    | 129.8                     | 0                          | (Börjesson, 2006;<br>Nilsson and<br>Bernesson, 2008) |
| - Harrowing            | 262                                                          | 286               | 81400                     | 68.2                      | 0                          |                                                      |
| Planting               | 660                                                          | 55000             | 46.2                      | 0.00                      |                            | (Börjesson, 2006)                                    |
| Fertilizer Application | 28.1                                                         | 30.6              | 2186.4                    | 0.95                      | 0.0016                     | (Nilsson and<br>Bernesson, 2008)                     |
| Stump Removal          | 674.5                                                        | 735.2             | 52464                     | 22.8                      | 0.0374                     | (Nilsson and<br>Bernesson, 2008)                     |
| Harvest & Chipping     | Harvest with self-propelled forage,<br>Claas Jaguar 695      |                   |                           |                           |                            | (Nilsson and<br>Bernesson, 2008)                     |
|                        | Capacity [ton/h]                                             |                   |                           |                           | 24.4                       |                                                      |
|                        | Fuel Consumption [l/h]                                       |                   |                           |                           | 40.0                       |                                                      |
| Field Transport        | Forwarding with Tractor 4WD, 100kW                           |                   |                           |                           |                            | (Nilsson and<br>Bernesson, 2008)                     |
|                        | Capacity                                                     |                   |                           |                           |                            |                                                      |
|                        | Capacity [ton/h]                                             |                   |                           |                           | 11.4                       |                                                      |
|                        | Fuel Consumption [l/h]                                       |                   |                           |                           | 19.0                       |                                                      |
| Road Transport         | Capacity [ton/load]                                          |                   |                           |                           | 34.6                       | (Baky et al., 2009)                                  |
|                        | Fuel Consumption [l/km]                                      |                   |                           |                           | 0.58                       | (Andersson and<br>Frisk, 2012)                       |
|                        | Load rate [% of distance]                                    |                   |                           |                           | 54%                        |                                                      |
| Incineration           | Emission factors in large scale heating<br>plant (50-300 MW) |                   |                           |                           |                            | (Paulrud et al., 2010)                               |
|                        | N <sub>2</sub> O [g/GJ]                                      |                   |                           |                           | 6                          |                                                      |
|                        | CH <sub>4</sub> [g/GJ]                                       |                   |                           |                           | 11                         |                                                      |

**Table S8** Data used to model emissions and energy for the reference case

|                                       |                                            |        |                                                        |
|---------------------------------------|--------------------------------------------|--------|--------------------------------------------------------|
| Green Fallow                          | Annual Yield (tons/ha)                     | 4.8    | Based on Aronsson<br>et al., 2009<br>(Phyllis 2, 2009) |
|                                       | N-content                                  | 2.81%  |                                                        |
| Annual mowing of<br>green fallow      | Mower-conditioner<br>(Valtra 6600 tractor) |        | (Lindgren et al.,<br>2002)                             |
|                                       | Fuel Consumption (kg/h)                    | 12.9   |                                                        |
|                                       | Cutting rate (ha/h)                        | 2.53   |                                                        |
| Natural Gas (NG)<br>combustion        | CO <sub>2</sub> [g/MJ]                     | 56.8   | (Gode et al., 2011)                                    |
|                                       | CH <sub>4</sub> [g/MJ]                     | 0.001  |                                                        |
|                                       | N <sub>2</sub> O [g/MJ]                    | 0.0001 |                                                        |
| Energy efficiency of<br>NG heat plant | Heat efficiency                            | 90%    | (Börjesson et al.,<br>2010)                            |
|                                       | Flue gas heat recovery efficiency          | 10%    |                                                        |
|                                       | Total efficiency                           | 100%   |                                                        |

## References

1. Ahlgren, S., 2004. Environmental impact of chemical and mechanical weed control in agriculture - a comparing study using Life Cycle Assessment (LCA) methodology. SIK, Göteborg.
2. Andersson, G., Frisk, M., 2012. Skogsbrukets transporter 2010 (Forestry transports in 2010) (No. 791–2013). Skogsforsk, Uppsala.
3. Andrén, O., Kätterer, T., 1997. ICBM: The Introductory Carbon Balance Model for exploration of soil carbon balances. *Ecological Applications* 7, 1226–1236. [https://doi.org/10.1890/1051-0761\(1997\)007\[1226:ITICBM\]2.0.CO;2](https://doi.org/10.1890/1051-0761(1997)007[1226:ITICBM]2.0.CO;2)
4. Andrén, O., Kätterer, T., Karlsson, T., 2004. ICBM regional model for estimations of dynamics of agricultural soil carbon pools. *Nutrient Cycling in Agroecosystems* 70, 231–239. <https://doi.org/10.1023/B:FRES.0000048471.59164.ff>
5. Aronsson, H., Stenberg, M., Rydberg, T., 2009. Kväve- och fosforutlakning från lerjord vid odling av två-årig grönträda med olika putsningsfrekvens (Report No. 111), Ekohydrologi (0347-9307). Dept. of Soil and Environment, Uppsala.
6. Baky, A., Forsberg, M., Rosenqvist, H., Jonsson, N., Sundberg, M., 2009. Skördeteknik och logistik för bättre lönsamhet från små odlingar av Salix (Harvest and logistics for better profitability from small cultivations of Short Rotation Willow Coppice ) (No. Projekt E06-643). VÄRMEFORSK Service AB, Stockholm.
7. Börjesson, P., 2006. Livscykelanalys av Salixproduktion, IMES/EESS Report. Department of Environmental and Energy Systems Studies, Lund university.
8. Börjesson, P., Tufvesson, L., Lantz, M., 2010. Life Cycle Assessment of Biofuels in Sweden, (LUTFD2/TFEM--10/3061--SE + (1-88); Lund University. Department of Technology and Society. Environmental and Energy Systems Studies.
9. GaBi Process data set: Ammonium nitrate (AN, 33.5% N); from ammonia and nitric acid, including primary production; production mix, at plant; 33.5 % nitrogen content (en) [WWW Document], 2018. . GaBi Process data set: (AN, 33.5% N). URL <http://gabi-documentation-2018.gabi-software.com/xml-data/processes/c2c4ebba-358f-493e-83ba-71bffe847e9a.xml> (accessed 10.14.20).
10. GaBi Process data set: Potassium chloride (KCl/MOP, 60% K<sub>2</sub>O); shaft mining and beneficiation, including primary production; production mix, at plant; 60% potassium content (en) [WWW Document], 2018. . GaBi Process data set: (KCl/MOP, 60% K<sub>2</sub>O). URL <http://gabi-documentation-2018.gabi-software.com/xml-data/processes/a2a8695e-968c-4341-922c-a007c8a8c56d.xml> (accessed 10.14.20).
11. GaBi Process data set: Triple superphosphate (TSP, 46% P<sub>2</sub>O<sub>5</sub>); rock phosphate acidulation with phosphoric acid, including primary production; production mix, at plant; 46 % phosphate content (en) [WWW Document], 2018. . GaBi Process data set: (TSP, 46% P<sub>2</sub>O<sub>5</sub>). URL <http://gabi-documentation-2018.gabi-software.com/xml-data/processes/8d0007f0-9ad8-43b0-86e4-ebe6e9f9d0e6.xml> (accessed 10.14.20).
12. Gode, J., Martinsson, F., Hagberg, L., Öman, A., Höglund, J., Palm, D., 2011. Uppskattade emissionsfaktorer för bränslen, el, värme och transporter (Estimated emission factors for fuels, electricity, heat and transport in Sweden) (No. A08-833), Miljöfaktaboken 2011. VÄRMEFORSK Service AB, Stockholm.
13. Kätterer, T., Bolinder, M.A., Andrén, O., Kirchmann, H., Menichetti, L., 2011. Roots contribute more to refractory soil organic matter than above-ground crop residues, as revealed by a long-term field experiment. *Agriculture, Ecosystems & Environment* 141, 184–192. <https://doi.org/10.1016/j.agee.2011.02.029>
14. Lindgren, M., Petterson, O., Hansson, P.-A., Norén, O., 2002. Jordbruks- och anläggningsmaskinens motorbelastning och avgasemissioner : samt metoder att minska bränsleförbrukning och avgasemissioner (Engine load pattern and engine exhaust gas emissions from off-road vehicles and methods to reduce fuel-consumption and engine exhaust gas emissions), JTI-rapport. JTI Institutet för Jordbruks- och Miljöteknik, Uppsala.

15. Manzoni, S., Lindh, M., Hoeber, S., Weih, M., 2021. Salix biomass and nitrogen content measured in a pot experiment, Uppsala, Sweden, 2018 – 2019. Dataset version 1.0. Bolin Centre Database. <https://doi.org/10.17043/manzoni-2021-salix-1>
16. Nilsson, D., Bernesson, S., 2008. Pelletering och brikettering av jordbruksråvaror: en systemstudie (Processing biofuels from farm raw materials : a systems study), Rapport (Institutionen för energi och teknik, SLU), 001. Institutionen för energi och teknik, SLU, Uppsala.
17. Öman, A., Hallberg, L., Rydberg, T., 2011. LCI för petroleumprodukter som används i Sverige (No. B1965), IVL Rapport. IVL Svenska Miljöinstitutet AB, Stockholm.
18. Paulrud, S., Fridell, E., Stripple, H., Gustafsson, T., 2010. Uppdatering av klimatrelaterade emissionsfaktorer, SMED Rapport. SMHI, Norrköping.
19. Phyllis 2, 2009. Phyllis2 - Green grass (#3193) [WWW Document]. Phyllis2, database for biomass and waste. URL <https://phyllis.nl/Biomass/View/3193> (accessed 10.14.20).
20. Rytter, R.-M., 2001. Biomass production and allocation, including @ne-root turnover, and annual N uptake in lysimeter-grown basket willows. Forest Ecology and Management 16.
21. Weih, M., Nordh, N.-E., 2002. Characterising willows for biomass and phytoremediation: growth, nitrogen and water use of 14 willow clones under different irrigation and fertilisation regimes. Biomass and Bioenergy 23, 397–413. [https://doi.org/10.1016/S0961-9534\(02\)00067-3](https://doi.org/10.1016/S0961-9534(02)00067-3)
